# Supplementary material
Source: HighWire-hosted journal article supplement (https://bmjopen.bmj.com/content/15/5/e098140)
Supplement: inline-supplementary-material-1 [file inline-supplementary-material-1.pdf]

Supplementary Table 1. PICO Framework

| PICO Component   | Details                                                                                                      |
|------------------|--------------------------------------------------------------------------------------------------------------|
| Population (P)   | Individuals of any age, gender, or ethnicity diagnosed with extrapulmonary tuberculosis (EPTB) in Indonesia. |
| Intervention (I) | N/A (Observational studies on prevalence; no intervention applied).                                          |
| Comparison (C)   | N/A (No comparison group; the study focuses on prevalence data).                                             |
| Outcome (O)      | Prevalence of EPTB in Indonesia, stratified by factors such as age, region, and clinical characteristics.    |

**Supplementary Table 2.** Search strategy that will be implemented on each database

| Database       | Keywords                                                                                                                                                                                                                                                                                                                                                                                                                                                                                                                                                                                                                                                                                                                                                                                          |
|----------------|---------------------------------------------------------------------------------------------------------------------------------------------------------------------------------------------------------------------------------------------------------------------------------------------------------------------------------------------------------------------------------------------------------------------------------------------------------------------------------------------------------------------------------------------------------------------------------------------------------------------------------------------------------------------------------------------------------------------------------------------------------------------------------------------------|
| PubMed         | <p>#1</p> <p>("Extrapulmonary Tuberculosis"[MeSH Terms] OR "extrapulmonary tuberculosis" OR "EPTB" OR "tuberculosis, extrapulmonary" OR "tuberculous lymphadenitis" OR "tuberculous meningitis" OR "tuberculous pleuritis" OR "tuberculous pericarditis" OR "tuberculous peritonitis" OR "genitourinary tuberculosis" OR "renal tuberculosis" OR "spinal tuberculosis" OR "osteoarticular tuberculosis" OR "cutaneous tuberculosis" OR "abdominal tuberculosis" OR "CNS tuberculosis" OR "central nervous system tuberculosis")</p> <p>#2</p> <p>("Indonesia" OR "Indonesian" OR "Java" OR "Sumatra" OR "Kalimantan" OR "Borneo" OR "Sulawesi" OR "Papua" OR "Bali" OR "Maluku" OR "Moluccas" OR "East Nusa Tenggara" OR "West Nusa Tenggara")</p> <p>#1 AND #2 with filter year 2005 to 2024</p> |
| Google Scholar | <p>("Extrapulmonary tuberculosis" OR "Spinal tuberculosis" OR "Pott's disease" OR "Lymphatic tuberculosis" OR "Tuberculous meningitis" OR "Pleural tuberculosis" OR "Abdominal tuberculosis" OR "Genitourinary tuberculosis" OR "Peritoneal tuberculosis" OR "Ocular tuberculosis" OR "Cutaneous tuberculosis") AND ("Indonesia" OR "Indonesian")</p> <p>with filter year 2005 to 2024</p>                                                                                                                                                                                                                                                                                                                                                                                                        |
| ScienceDirect  | <p>("Extrapulmonary Tuberculosis" OR "Extrapulmonary TB") AND "Indonesia"</p>                                                                                                                                                                                                                                                                                                                                                                                                                                                                                                                                                                                                                                                                                                                     |
| Scopus         | <p>("Extrapulmonary tuberculosis" OR "Spinal tuberculosis" OR "Pott's disease" OR "Lymphatic tuberculosis" OR "Tuberculous meningitis" OR "Pleural tuberculosis" OR "Abdominal tuberculosis" OR "Genitourinary tuberculosis" OR "Peritoneal tuberculosis" OR "Ocular tuberculosis" OR "Cutaneous tuberculosis") AND ("Indonesia" OR "Indonesian")</p>                                                                                                                                                                                                                                                                                                                                                                                                                                             |
| Index Medicus  | <p>("Extrapulmonary Tuberculosis" AND "Indonesia") OR ("Extrapulmonary TB" AND "Indonesia")</p>                                                                                                                                                                                                                                                                                                                                                                                                                                                                                                                                                                                                                                                                                                   |
